# Supplementary material for: Identification of key genes and regulatory networks associated with atherosclerotic carotid artery stenosis through comprehensive bioinformatics analysis and machine learning
Source: Research Square preprint supplement (doi:10.21203/rs.3.rs-7112702/v1), 2025-08-11
Supplement: Supplementary file 1 [file cf710f1016d203a18ee00ee8.docx]

**Table S1** PCR primers sequences

| RNA | Forward sequence | Reverse sequence |
| --- | --- | --- |
| ANPEP | 5′-GCACTGATTCAGAAAAGGTGTTA-3′ | 5′-CCTGAAGGAGAATGTCTCTT-3′ |
| CSF1R | 5'-CACTCCAGCAGCTCAAGCAGA-3' | 5'-GTGCACCAGCTCAATGGTTTC-3' |
| MMP9 | 5’-AAACCATCGAAGGGACTGC-3’ | 5’-TTACCTTGACTGATATTGTTTTGACA-3’ |
| CASQ2 | 5'-AATGGCACCCAGTGTAAAGCA-3' | 5'-AGCCTATTCTCAAACCAACCACA-3' |
| CD206 | 5'-GGAGGCTTGTCAGAATGGAAATC -3' | 5'-TGATGGCCCTTTCGGCTCCC-3' |
| CD86 | 5'-ACCATGACCGAGAAGGACGTAGA-3' | 5'-AAACTGGTTATTGCCTCTTCTGC-3' |
| MPO | 5'-AGGCCAGAATTATCACGAAGT-3' | 5'-AGGGTCTCGATTCCATGGCA-3' |
| GAPDH | 5'-GCACCGTCAAGCCTGAGAAC-3' | 5'-TGGTGAAGACGCGAGTGGA-3' |
